# Supplementary material
Source: ML conference proceedings conference paper supplement (https://proceedings.mlr.press/v31/zach13a.html)
Supplement: Supplementary file [file zach13a-supp.pdf]

# Dual Decomposition for Joint Discrete-Continuous Optimization Supplementary Material

Christopher Zach  
Microsoft Research Cambridge

March 6, 2013

## Contents

|          |                                                                        |          |
|----------|------------------------------------------------------------------------|----------|
| <b>1</b> | <b>The Dual of <math>E_{\text{DC-MRF}}</math></b>                      | <b>1</b> |
| <b>2</b> | <b>The Convex Relaxation Derived from <math>L_{\text{DD-I}}</math></b> | <b>2</b> |
| <b>3</b> | <b>The Convex Relaxation Derived from <math>L_{\text{DD}}</math></b>   | <b>3</b> |

## 1 The Dual of $E_{\text{DC-MRF}}$

We recall the DC-MRF primal energy with pairwise potentials.

$$\begin{aligned}
 E_{\text{DC-MRF}}(x, y) &= \sum_{(s,t) \in \mathcal{E}} \sum_{i,j} (f_{st}^{ij})_{\circlearrowleft} \left( x_{st}^{ij}, y_{st \rightarrow s}^{ij}, y_{st \rightarrow t}^{ij} \right) \\
 \text{s.t. } x_s^i &= \sum_j x_{st}^{ij}, & x_t^j &= \sum_i x_{st}^{ij}, & x_s &\in \Delta^L, x_{st} \in \Delta^{L^2}, \\
 y_s^i &= \sum_j y_{st \rightarrow s}^{ij}, & y_t^j &= \sum_i y_{st \rightarrow t}^{ij}
 \end{aligned} \tag{1}$$

We absorbed any bounds on the arguments of  $f_{st}^{ij}$  into those functions. In order to derive (a particular) dual we need the following fact:

*Fact 1.* The conjugate of  $\phi(x, y) \stackrel{\text{def}}{=} \sum_i (f_i)_{\circlearrowleft}(x_i, y_i) + \iota_{\Delta}(x)$  is given by

$$\phi^*(z, w) = \max_i \{z_i + (f_i)^*(w_i)\}. \tag{2}$$

*Proof.* We need to calculate

$$\begin{aligned}
 \phi^*(z, w) &= \max_{x \in \Delta, y} x^T z + y^T w - \sum_i x_i f_i(y_i/x_i) && [t_i = y_i/x_i] \\
 &= \max_{x \in \Delta, t} \sum_i x_i (z_i + t_i w_i - f_i(t_i)) \\
 &= \max_{x \in \Delta} \sum_i x_i \left( z_i + \max_{t_i} \{t_i w_i - f_i(t_i)\} \right) \\
 &= \max_{x \in \Delta} \sum_i x_i (z_i + f_i^*(w_i)) = \max_i \{z_i + (f_i)^*(w_i)\}.
 \end{aligned}$$

This concludes the proof. □

By introducing respective Lagrange multipliers  $p_{st \rightarrow s}^i, p_{st \rightarrow t}^i, q_{st \rightarrow s}^i, q_{st \rightarrow t}^i$ , we obtained the following dual

$$-E_{\text{DC-MRF}}^*(p, q) = \sum_{(s,t) \in \mathcal{E}} \max_{i,j} \left\{ -p_{st \rightarrow s}^i - p_{st \rightarrow t}^j + (f_{st}^{ij})^*(-q_{st \rightarrow s}^i, -q_{st \rightarrow t}^j) \right\} \quad (3)$$

$$+ \sum_s \max_i \left\{ \sum_{t \in \text{out}(s)} p_{st \rightarrow s}^i + \sum_{t \in \text{in}(s)} p_{ts \rightarrow s}^i \right\} + \sum_{s,i} \iota \left\{ \sum_{t \in \text{out}(s)} q_{st \rightarrow s}^i + \sum_{t \in \text{in}(s)} q_{ts \rightarrow s}^i = 0 \right\}.$$

The last two terms come from  $\sum_s \iota_{\Delta}(x_s) + \sum_s 0^T y_s$  in the primal.

## 2 The Convex Relaxation Derived from $L_{\text{DD-I}}$

After introducing Lagrange multipliers  $\lambda_{st \rightarrow s}^i$  and  $\lambda_{st \rightarrow t}^i$  for the consistency constraints between  $x_s$  and  $x_{st}$ , we have the following Lagrangian:

$$L_{\text{DD-I}}(x, z; \lambda, \mu) = \sum_{s \sim t} \sum_{i,j} x_{st}^{ij} \left( f_{st}^{ij}(z_{st \rightarrow s}, z_{st \rightarrow t}) - \lambda_{st \rightarrow s}^i - \lambda_{st \rightarrow t}^j \right) + \sum_{s,i} x_s^i \left( \sum_{t \in \text{out}(s)} \lambda_{st \rightarrow s}^i + \sum_{t \in \text{in}(s)} \lambda_{ts \rightarrow s}^i \right)$$

$$+ \sum_{s \sim t} (\mu_{st \rightarrow s}(z_s - z_{st \rightarrow s}) + \mu_{st \rightarrow t}(z_t - z_{st \rightarrow t}))$$

$$= \sum_{s \sim t} \left( \sum_{i,j} x_{st}^{ij} \left( f_{st}^{ij}(z_{st \rightarrow s}, z_{st \rightarrow t}) - \lambda_{st \rightarrow s}^i - \lambda_{st \rightarrow t}^j \right) - \mu_{st}^T z_{st} \right)$$

$$+ \sum_{s,i} x_s^i \left( \sum_{t \in \text{out}(s)} \lambda_{st \rightarrow s}^i + \sum_{t \in \text{in}(s)} \lambda_{ts \rightarrow s}^i \right) + \sum_s z_s \left( \sum_{t \in \text{out}(s)} \mu_{st \rightarrow s} + \sum_{t \in \text{in}(s)} \mu_{ts \rightarrow s} \right).$$

Since we minimize over  $x_s \in \Delta^L$  and  $x_{st} \in \Delta^{L^2}$ , we eliminate  $x$  and obtain

$$L_{\text{DD-I}}(z; \lambda, \mu) = \sum_{s \sim t} \left( \min_{i,j} \left\{ f_{st}^{ij}(z_{st \rightarrow s}, z_{st \rightarrow t}) - \lambda_{st \rightarrow s}^i - \lambda_{st \rightarrow t}^j \right\} - \mu_{st}^T z_{st} \right) + \sum_s \min_i \left\{ \sum_{t \in \text{out}(s)} \lambda_{st \rightarrow s}^i + \sum_{t \in \text{in}(s)} \lambda_{ts \rightarrow s}^i \right\}$$

$$+ \sum_s z_s \left( \sum_{t \in \text{out}(s)} \mu_{st \rightarrow s} + \sum_{t \in \text{in}(s)} \mu_{ts \rightarrow s} \right).$$

Elimination of  $z$  by minimizing over  $z_s, z_{st} \in \mathbb{R}$  yields the dual

$$E_{\text{DD-I}}^*(\lambda, \mu) = \min_{z_s, z_{st}} \sum_{s \sim t} \left( \min_{i,j} \left\{ f_{st}^{ij}(z_{st}) - \lambda_{st \rightarrow s}^i - \lambda_{st \rightarrow t}^j \right\} - \mu_{st}^T z_{st} \right)$$

$$+ \sum_s \min_i \left\{ \sum_{t \in \text{out}(s)} \lambda_{st \rightarrow s}^i + \sum_{t \in \text{in}(s)} \lambda_{ts \rightarrow s}^i \right\} + \sum_s z_s \left( \sum_{t \in \text{out}(s)} \mu_{st \rightarrow s} + \sum_{t \in \text{in}(s)} \mu_{ts \rightarrow s} \right)$$

$$= \sum_{s \sim t} \min_{z_{st}} \left\{ \min_{i,j} \left\{ f_{st}^{ij}(z_{st}) - \lambda_{st \rightarrow s}^i - \lambda_{st \rightarrow t}^j \right\} - \mu_{st}^T z_{st} \right\}$$

$$+ \sum_s \min_i \left\{ \sum_{t \in \text{out}(s)} \lambda_{st \rightarrow s}^i + \sum_{t \in \text{in}(s)} \lambda_{ts \rightarrow s}^i \right\} + \sum_s \min_{z_s} \left\{ z_s \left( \sum_{t \in \text{out}(s)} \mu_{st \rightarrow s} + \sum_{t \in \text{in}(s)} \mu_{ts \rightarrow s} \right) \right\}$$

$$= \sum_{s \sim t} - \max_{z_{st}} \left\{ \mu_{st}^T z_{st} - \min_{i,j} \left\{ f_{st}^{ij}(z_{st}) - \lambda_{st \rightarrow s}^i - \lambda_{st \rightarrow t}^j \right\} \right\}$$

$$\begin{aligned}
& + \sum_s \min_i \left\{ \sum_{t \in \text{out}(s)} \lambda_{st \rightarrow s}^i + \sum_{t \in \text{in}(s)} \lambda_{ts \rightarrow s}^i \right\} - \sum_s \iota \left\{ \sum_{t \in \text{out}(s)} \mu_{st \rightarrow s} + \sum_{t \in \text{in}(s)} \mu_{ts \rightarrow s} = 0 \right\} \\
& = \sum_{s \sim t} - \max_{ij} \left\{ (f_{st}^{ij})^*(\mu_{st}) + \lambda_{st \rightarrow s}^i + \lambda_{st \rightarrow t}^j \right\} \\
& + \sum_s \min_i \left\{ \sum_{t \in \text{out}(s)} \lambda_{st \rightarrow s}^i + \sum_{t \in \text{in}(s)} \lambda_{ts \rightarrow s}^i \right\} - \sum_s \iota \left\{ \sum_{t \in \text{out}(s)} \mu_{st \rightarrow s} + \sum_{t \in \text{in}(s)} \mu_{ts \rightarrow s} = 0 \right\},
\end{aligned}$$

where we used the fact that  $(\inf_i f_i)^* = \sup_i f_i^*$  (see [Hiriart-Urruty & Lemarechal, Thm 2.4.1]). In order to compute the primal we rewrite  $L(\lambda, \mu)$  as

$$E_{\text{DD-I}}^*(\lambda, \mu) = \sum_{(s,t) \in \mathcal{E}} - \max_{ij} \left\{ (f_{st}^{ij})^*(\mu_{st}) + \lambda_{st}^{ij} \right\} - \sum_s \max_i \lambda_s^i - \sum_s \iota \{ \mu_s = 0 \} + \sum_{(s,t),i} 0 \cdot \lambda_{st \rightarrow s}^i + \sum_{(s,t)} 0^T \mu_{st}$$

subject to (we state the corresponding multipliers in the right column)

$$\begin{aligned}
\lambda_{st}^{ij} &= \lambda_{st \rightarrow s}^i + \lambda_{st \rightarrow t}^j & [x_{st}^{ij}] \\
\lambda_s^i &= - \sum_{t \in \text{out}(s)} \lambda_{st \rightarrow s}^i - \sum_{t \in \text{in}(s)} \lambda_{ts \rightarrow s}^i & [x_s^i] \\
\mu_{st}^{ij} &= \mu_{st} & [z_{st}^{ij}] \\
\mu_s &= - \sum_{t \in \text{out}(s)} \mu_{st \rightarrow s} - \sum_{t \in \text{in}(s)} \mu_{ts \rightarrow s}. & [z_s]
\end{aligned}$$

We explicitly added the zero terms on the additional unknowns to highlight that they correspond to constraints in the primal.  $0 \cdot \lambda_{st \rightarrow s}^i$  translates to the usual marginalization constraints,  $x_s^i = \sum_j x_{st}^{ij}$  etc.  $0 \cdot \mu_{st \rightarrow s}$  e.g. translates to  $z_s = \sum_{ij} z_{st \rightarrow s}^{ij}$ , since  $\mu_{st \rightarrow s}$  appears with  $+1$  in constraints  $z_s$  and with  $-1$  in constraints  $z_{st}^{ij}$  for all  $i, j$ . Hence, the corresponding primal reads as

$$\begin{aligned}
E_{\text{DC-DD-I}}(x, z) &= \sum_{s,t} \sum_{i,j} (f_{st}^{ij})_{\circ} (x_{st}^{ij}, z_{st}^{ij}) & (4) \\
\text{s.t. } x_s^i &= \sum_j x_{st}^{ij}, & x_t^j = \sum_i x_{st}^{ij}, & x_s \in \Delta^L, x_{st} \in \Delta^{L^2} \\
z_s &= \sum_{i,j} z_{st \rightarrow s}^{ij}, & z_t &= \sum_{i,j} z_{st \rightarrow t}^{ij}.
\end{aligned}$$

### 3 The Convex Relaxation Derived from $L_{\text{DD}}$

Again, after introducing Lagrange multipliers  $\lambda_{st \rightarrow s}^i$  and  $\lambda_{st \rightarrow t}^j$  for the consistency constraints between  $x_s$  and  $x_{st}$ , we have the following Lagrangian:

$$\begin{aligned}
L_{\text{DD}}(x, z; \lambda, \mu) &= \sum_{s \sim t} \sum_{i,j} x_{st}^{ij} \left( f_{st}^{ij}(z_{st \rightarrow s}^i, z_{st \rightarrow t}^j) - \lambda_{st \rightarrow s}^i - \lambda_{st \rightarrow t}^j \right) + \sum_{s,i} x_s^i \left( \sum_{t \in \text{out}(s)} \lambda_{st \rightarrow s}^i + \sum_{t \in \text{in}(s)} \lambda_{ts \rightarrow s}^i \right) \\
&+ \sum_{s \sim t} \sum_i x_s^i \left( \mu_{st \rightarrow s}^i (z_s - z_{st \rightarrow s}^i) + \mu_{st \rightarrow t}^i (z_t - z_{st \rightarrow t}^i) \right) \\
&= \sum_{s \sim t} \sum_{i,j} x_{st}^{ij} \left( f_{st}^{ij}(z_{st \rightarrow s}^i, z_{st \rightarrow t}^j) - \lambda_{st \rightarrow s}^i - \lambda_{st \rightarrow t}^j - \mu_{st \rightarrow s}^i z_{st \rightarrow s}^i - \mu_{st \rightarrow t}^j z_{st \rightarrow t}^j \right)
\end{aligned}$$

$$\begin{aligned}
& + \sum_{s,i} x_s^i \left( \sum_{t \in \text{out}(s)} \lambda_{st \rightarrow s}^i + \sum_{t \in \text{in}(s)} \lambda_{ts \rightarrow s}^i \right) + \sum_s z_s \sum_i x_s^i \left( \sum_{t \in \text{out}(s)} \mu_{st \rightarrow s}^i + \sum_{t \in \text{in}(s)} \mu_{ts \rightarrow s}^i \right) \\
& = \sum_{s \sim t} \sum_{i,j} x_{st}^{ij} \left( f_{st}^{ij}(z_{st \rightarrow s}^i, z_{st \rightarrow t}^j) - \lambda_{st \rightarrow s}^i - \lambda_{st \rightarrow t}^j - \mu_{st \rightarrow s}^i z_{st \rightarrow s}^i - \mu_{st \rightarrow t}^j z_{st \rightarrow t}^j \right) \\
& + \sum_{s,i} x_s^i \left( \sum_{t \in \text{out}(s)} \lambda_{st \rightarrow s}^i + \sum_{t \in \text{in}(s)} \lambda_{ts \rightarrow s}^i + z_s \sum_{t \in \text{out}(s)} \mu_{st \rightarrow s}^i + z_s \sum_{t \in \text{in}(s)} \mu_{ts \rightarrow s}^i \right).
\end{aligned}$$

In the second line we expanded the marginalization constraints, e.g.  $x_s^i = \sum_j x_{st}^{ij}$ , to move the terms into the first sum. In order to obtain the dual we minimize over  $x_s$  and  $x_{st}$  subject to the simplex constraints, and the dual energy is computed by minimizing over  $z$ ,

$$\begin{aligned}
E_{\text{DD}}^*(\lambda, \mu) & = \sum_{s \sim t} \min_{\{z_{st \rightarrow s}^i, z_{st \rightarrow s}^j\}} \min_{i,j} \left\{ f_{st}^{ij}(z_{st \rightarrow s}^i, z_{st \rightarrow t}^j) - \lambda_{st \rightarrow s}^i - \lambda_{st \rightarrow t}^j - \mu_{st \rightarrow s}^i z_{st \rightarrow s}^i - \mu_{st \rightarrow t}^j z_{st \rightarrow t}^j \right\} \\
& + \sum_s \min_{z_s} \min_i \left\{ \sum_{t \in \text{out}(s)} \lambda_{st \rightarrow s}^i + \sum_{t \in \text{in}(s)} \lambda_{ts \rightarrow s}^i + z_s \sum_{t \in \text{out}(s)} \mu_{st \rightarrow s}^i + z_s \sum_{t \in \text{in}(s)} \mu_{ts \rightarrow s}^i \right\} \\
& = \sum_{s \sim t} \min_{i,j} \min_{z_{st \rightarrow s}^i, z_{st \rightarrow s}^j} \left\{ f_{st}^{ij}(z_{st \rightarrow s}^i, z_{st \rightarrow t}^j) - \lambda_{st \rightarrow s}^i - \lambda_{st \rightarrow t}^j - \mu_{st \rightarrow s}^i z_{st \rightarrow s}^i - \mu_{st \rightarrow t}^j z_{st \rightarrow t}^j \right\} \\
& + \sum_s \min_i \min_{z_s} \left\{ \sum_{t \in \text{out}(s)} \lambda_{st \rightarrow s}^i + \sum_{t \in \text{in}(s)} \lambda_{ts \rightarrow s}^i + z_s \sum_{t \in \text{out}(s)} \mu_{st \rightarrow s}^i + z_s \sum_{t \in \text{in}(s)} \mu_{ts \rightarrow s}^i \right\} \\
& = \sum_{s \sim t} \min_{i,j} - \max_{z_{st \rightarrow s}^i, z_{st \rightarrow s}^j} \left\{ \mu_{st \rightarrow s}^i z_{st \rightarrow s}^i + \mu_{st \rightarrow t}^j z_{st \rightarrow t}^j - f_{st}^{ij}(z_{st \rightarrow s}^i, z_{st \rightarrow t}^j) + \lambda_{st \rightarrow s}^i + \lambda_{st \rightarrow t}^j \right\} \\
& + \sum_s \min_i \left\{ \sum_{t \in \text{out}(s)} \lambda_{st \rightarrow s}^i + \sum_{t \in \text{in}(s)} \lambda_{ts \rightarrow s}^i - \iota \left\{ \sum_{t \in \text{out}(s)} \mu_{st \rightarrow s}^i + \sum_{t \in \text{in}(s)} \mu_{ts \rightarrow s}^i = 0 \right\} \right\} \\
& = \sum_{s \sim t} \min_{i,j} - \left\{ (f_{st}^{ij})^*(\mu_{st \rightarrow s}^i, \mu_{st \rightarrow t}^j) + \lambda_{st \rightarrow s}^i + \lambda_{st \rightarrow t}^j \right\} \\
& + \sum_s \min_i \left\{ \sum_{t \in \text{out}(s)} \lambda_{st \rightarrow s}^i + \sum_{t \in \text{in}(s)} \lambda_{ts \rightarrow s}^i \right\} - \sum_{s,i} \iota \left\{ \sum_{t \in \text{out}(s)} \mu_{st \rightarrow s}^i + \sum_{t \in \text{in}(s)} \mu_{ts \rightarrow s}^i = 0 \right\} \\
& = - \sum_{s \sim t} \max_{i,j} \left\{ (f_{st}^{ij})^*(\mu_{st \rightarrow s}^i, \mu_{st \rightarrow t}^j) + \lambda_{st \rightarrow s}^i + \lambda_{st \rightarrow t}^j \right\} \\
& - \sum_s \max_i \left\{ - \sum_{t \in \text{out}(s)} \lambda_{st \rightarrow s}^i - \sum_{t \in \text{in}(s)} \lambda_{ts \rightarrow s}^i \right\} - \sum_{s,i} \iota \left\{ \sum_{t \in \text{out}(s)} \mu_{st \rightarrow s}^i + \sum_{t \in \text{in}(s)} \mu_{ts \rightarrow s}^i = 0 \right\} \\
& = E_{\text{DC-MRF}}^*(-\lambda, -\mu).
\end{aligned}$$
